# Supplementary material
Source: PubMed Central journal article supplement (PMC3138542)
Supplement: NIHMS270165-supplement-Supplementary_Table.pdf [file NIHMS270165-supplement-Supplementary_Table.pdf]

**Supplementary Table.** Final logistic regression model with receipt of adjuvant chemotherapy as outcome\*

| Variable                                                                                          | Regression Coefficient | 95% Confidence Interval |
|---------------------------------------------------------------------------------------------------|------------------------|-------------------------|
| Intercept                                                                                         | 0.198                  | -0.667 to 1.062         |
| Black race                                                                                        | -0.683                 | -1.195 to -0.170        |
| Age, y                                                                                            |                        |                         |
| 71–75                                                                                             | -0.327                 | -0.578 to -0.075        |
| 76–80                                                                                             | -0.893                 | -1.149 to -0.637        |
| ≥81                                                                                               | -2.243                 | -2.507 to -1.979        |
| Black race 71–75                                                                                  | 0.540                  | -0.179 to 1.258         |
| Black race 76–80                                                                                  | 0.621                  | -0.095 to 1.337         |
| Black race 81+                                                                                    | 1.262                  | 0.455 to 2.069          |
| Female                                                                                            | -0.153                 | -0.326 to 0.020         |
| Marital status                                                                                    |                        |                         |
| Single, separated, or divorced                                                                    | -0.327                 | -0.579 to -0.075        |
| Widowed                                                                                           | -0.355                 | -0.544 to -0.166        |
| Missing                                                                                           | -0.652                 | -1.204 to -0.099        |
| Comorbidity                                                                                       |                        |                         |
| Myocardial infarction—yes                                                                         | 0.001                  | -0.428 to 0.429         |
| Liver disease—yes                                                                                 | 0.053                  | -0.808 to 0.914         |
| Congestive heart failure—yes                                                                      | -0.229                 | -0.585 to 0.127         |
| Renal failure—yes                                                                                 | 0.140                  | -0.769 to 1.050         |
| Comorbidity index score 1                                                                         | -0.206                 | -0.386 to -0.025        |
| Comorbidity index score 2+                                                                        | -0.351                 | -0.614 to -0.088        |
| Length of stay for resection                                                                      |                        |                         |
| 7-13 days                                                                                         | -0.272                 | -0.504 to -0.039        |
| 14+ days                                                                                          | -1.138                 | -1.407 to -0.868        |
| Missing                                                                                           | -2.202                 | -5.125 to 0.720         |
| Rehospitalized within six weeks—yes                                                               | -0.473                 | -0.723 to -0.222        |
| Registry                                                                                          |                        |                         |
| Atlanta/rural Georgia                                                                             | 0.749                  | 0.339 to 1.159          |
| Connecticut                                                                                       | 0.516                  | 0.196 to 0.836          |
| Hawaii                                                                                            | 0.482                  | -0.696 to 1.661         |
| Iowa                                                                                              | 0.599                  | 0.274 to 0.925          |
| Los Angeles                                                                                       | 0.416                  | 0.098 to 0.733          |
| Michigan                                                                                          | 0.456                  | 0.136 to 0.775          |
| New Mexico                                                                                        | 0.633                  | 0.067 to 1.199          |
| Seattle                                                                                           | 0.233                  | -0.119 to 0.585         |
| Utah                                                                                              | 0.246                  | -0.224 to 0.716         |
| Race-specific percentage of ≥25-year-olds with high school education in census tract (continuous) | 0.009                  | 0.000 to 0.018          |
| Race-/age-specific median income in census tract                                                  | 0.002                  | -0.007 to 0.012         |

|                                                                                                   |        |                  |
|---------------------------------------------------------------------------------------------------|--------|------------------|
| (continuous, \$1,000)                                                                             |        |                  |
| Year of diagnosis                                                                                 |        |                  |
| 1993                                                                                              | -0.215 | -0.461 to 0.031  |
| 1994                                                                                              | -0.105 | -0.352 to 0.143  |
| 1995                                                                                              | -0.265 | -0.512 to -0.019 |
| 1996                                                                                              | -0.007 | -0.262 to 0.247  |
| Year-specific volume of CRC chemotherapy consultations for patient's medical oncologist (MOVOLYR) | 0.079  | 0.015 to 0.143   |
| MOVOLYR <sup>2</sup>                                                                              | -0.004 | -0.008 to 0.000  |
| Board certified                                                                                   |        |                  |
| Yes                                                                                               | 0.168  | -0.067 to 0.403  |
| Missing                                                                                           | 0.953  | -0.621 to 2.526  |
| Medical oncologist's number of years of practice                                                  |        |                  |
| 11–20                                                                                             | 0.307  | 0.017 to 0.597   |
| 21–30                                                                                             | 0.440  | 0.139 to 0.741   |
| ≥31                                                                                               | 0.498  | 0.142 to 0.854   |
| Medical oncologist admits to resection hospital                                                   |        |                  |
| Yes                                                                                               | 0.314  | 0.051 to 0.577   |
| Missing                                                                                           | -0.295 | -0.694 to 0.104  |
| Resection hospital ownership                                                                      |        |                  |
| Nonprofit                                                                                         | 0.554  | 0.290 to 0.818   |
| For profit                                                                                        | 0.469  | 0.120 to 0.818   |
| Missing                                                                                           | 2.312  | -0.695 to 5.320  |
| Teaching hospital—yes                                                                             | -0.267 | -0.442 to -0.093 |

\*Reference groups: race = white, age = 66–70 years, race- and age-interaction = blackX66-70 years, marital status = married, length of stay for resection < 7 days, comorbidity index score = 0, registry = San Francisco/San Jose, year of diagnosis = 1992, medical oncologist's number of years in practice < 10, resection hospital ownership = government.
